# Supplementary material
Source: PubMed Central journal article supplement (PMC3748630)

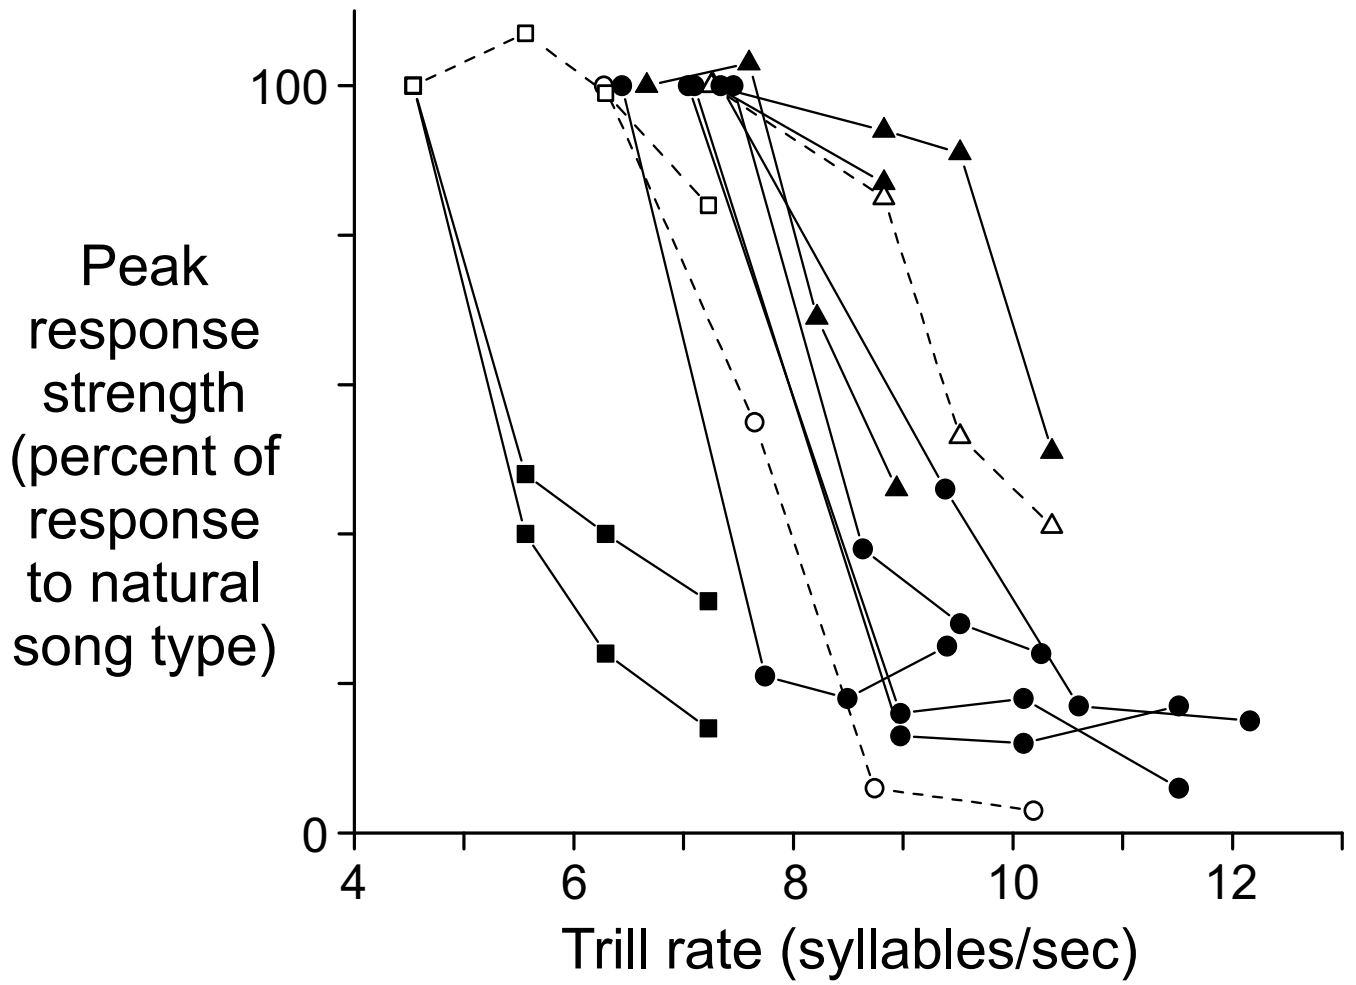

SUPPLEMENTAL FIGURE 1

Supplement: NIHMS493111-supplement-Fig_SUPP_1.pdf [file NIHMS493111-supplement-Fig_SUPP_1.pdf]
